# Supplementary material for: Large-Scale Discovery and Characterization of Protein Regulatory Motifs in Eukaryotes
Source: PubMed Central journal article supplement (PMC3012054; doi:10.1371/journal.pone.0014444), 2010-12-29
Supplement: pone.0014444.s004.pdf [file pone.0014444.s004.pdf]

| <i>Motif</i>     | <i>Pos. Bias</i> | <i>GO term (p)</i>           | <i>Domain enrichment</i> | <i>Overlap Z-score</i> |
|------------------|------------------|------------------------------|--------------------------|------------------------|
| K[KRP].K         |                  | nuclear lumen (1e-70)        | PHD (1e-04)              | -1.3                   |
| LF[LTW]          |                  | ER (1e-49)                   | MFS_1 (1e-05)            | 1.1                    |
| Q.Q[QEL]         | Y                | nuclear lumen (1e-14)        |                          |                        |
| F...[FVY]I       |                  | ER (1e-19)                   | MFS_1 (1e-04)            | 1                      |
| V.[ILV]I         |                  | ER (1e-23)                   | MFS_1 (0.001)            | -0.6                   |
| I..S[DNF]        |                  | cellular loc. (1e-10)        | WD40 (0.01)              | 2.6                    |
| T..[TLF]T        |                  | ER (1e-22)                   | E1-E2_ATPase (1e-06)     | -1.9                   |
| PP[PNQ]          |                  | transcription (1e-09)        | RRM_1 (1e-06)            | -3.4                   |
| T.[ASD]N         | Y                | nuclear lumen (1e-07)        |                          |                        |
| R.Q[LVK]         |                  | nuclear lumen (1e-20)        |                          |                        |
| I.Y[GVW]         |                  | ER (1e-16)                   | AA_permease (0.01)       | 1.2                    |
| RF[YNK][SWM]     | Y                | mitochondrial part (1e-05)   |                          |                        |
| C..C[GEL]        | Y                | transcription (1e-10)        | zf-C2H2 (1e-04)          | 5.8                    |
| [KY]FV[KW]       |                  | ER (1e-09)                   |                          |                        |
| LF..[GIM]V[FAL]  |                  |                              |                          |                        |
| P[LIA]...K[TDC]R |                  | transporter activity (1e-08) | Mito_carr (1e-19)        | 1.1                    |

**Figure S3: Enrichment analysis of sub-cellular localization motifs**

Enrichment analysis table for motifs associated with sub-cellular localization (Figure 3). For each motif, we indicate 1) the presence of a position bias, 2) top Gene Ontology (GO) enrichment for motif targets (i.e., motif-containing proteins in motif-enriched clusters), 3) top domain enrichment (Pfam) for motif targets, 4) Domain overlap score indicating the positional overlap between the motif and the most enriched domain.
