# Supplementary material for: Large-Scale Discovery and Characterization of Protein Regulatory Motifs in Eukaryotes
Source: PubMed Central journal article supplement (PMC3012054; doi:10.1371/journal.pone.0014444), 2010-12-29
Supplement: pone.0014444.s005.pdf [file pone.0014444.s005.pdf]

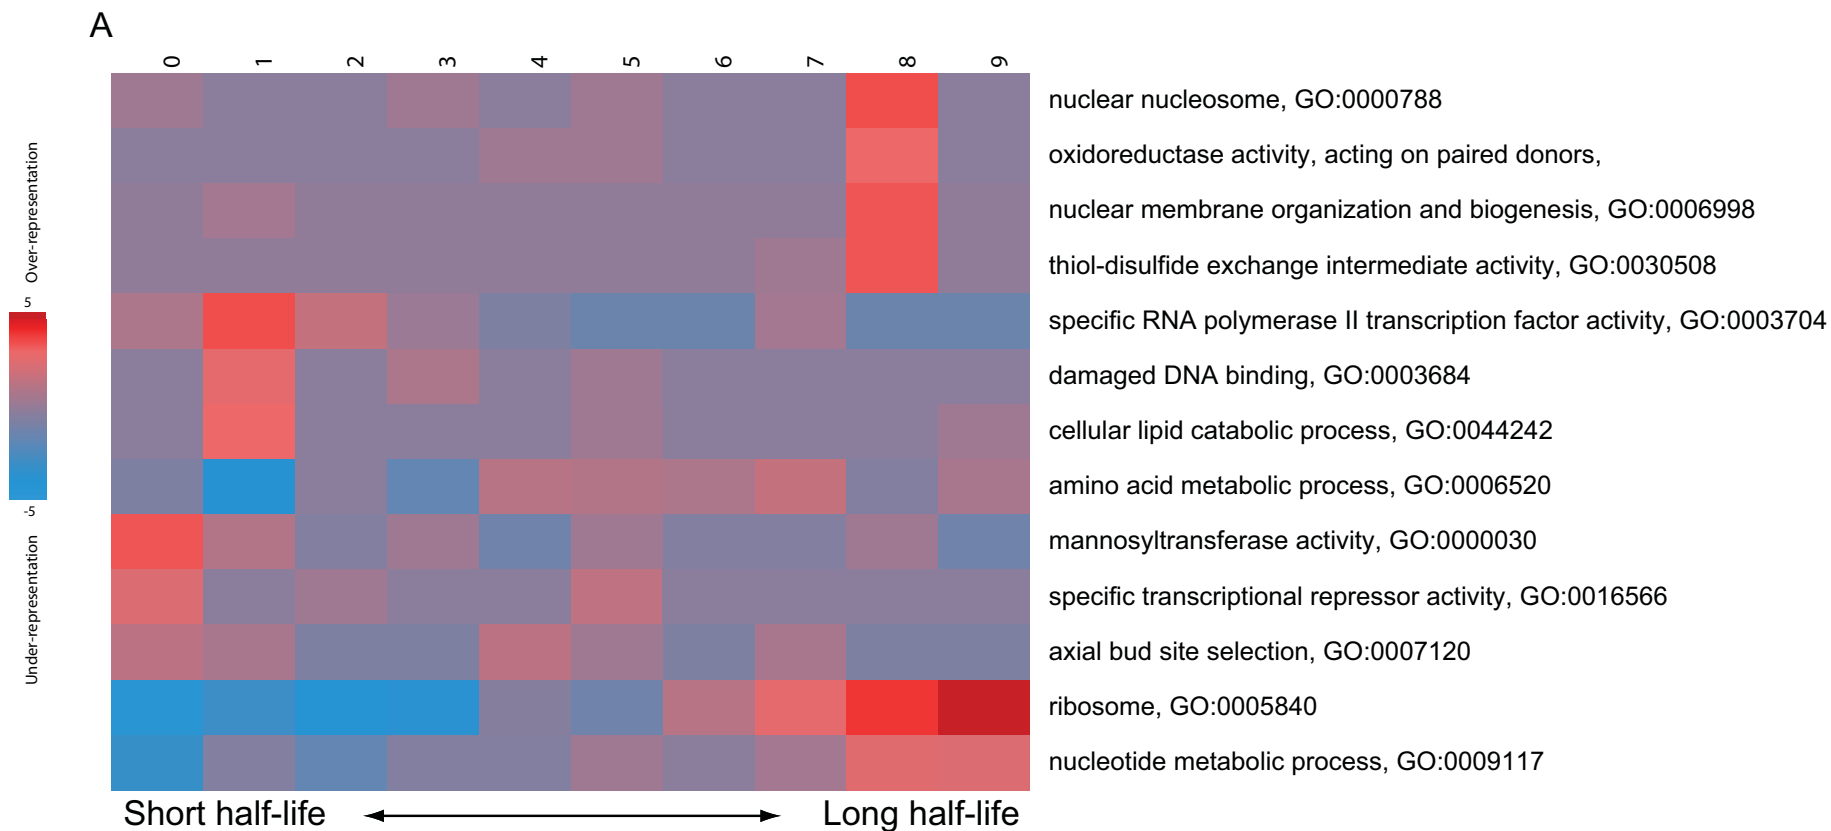

**B**

Note: GO and domain enrichment are for all proteins with a motif

| Motif      | Pos. Bias | GO term (p)                       | Domain enrichment | Overlap Z-score |
|------------|-----------|-----------------------------------|-------------------|-----------------|
| R.[RSY]S   |           | bud neck (p<1e-07)                | Pkinase (p<1e-04) | -5.2            |
| K.L[RFS]   |           | protein kinase activity (p<0.001) | Pkinase (p<1e-04) | 1.95            |
| L...I      |           | protein kinase activity (p<0.001) | Pkinase (p<0.01)  | 3.23            |
| I...I[KDY] | Y         | protein kinase activity (p<0.001) | Pkinase (p<1e-05) | 4.99            |

**Figure S4: GO analysis of protein half-life and enrichment analysis of half-life motifs**

(A) iPAGE analysis (<http://tavazoielab.princeton.edu/iPAGE/>) of quantitative half-life data in *S. cerevisiae*. The half-life values for ~3,750 yeast proteins were sorted and binned into ten equally populated classes, with the shortest half-life proteins comprising the left-most columns and longest half-life proteins comprising the right most columns. The columns represent protein behavior classes and correspond to those in Figure 4. Proteins with short half-lives tend to be enriched for transcription factors whereas proteins with long half-lives are enriched for ribosomal and nucleotide metabolism proteins. (B) Enrichment analysis table for motifs associated with protein half-life. GO and domain enrichment analyses were applied to all proteins containing a motif. Protein kinase domains appear to be enriched for motifs associated with short half-life. While the last three motifs are likely to be domain signatures, the top motif “R.[RSY]S” has a strongly negative overlap Z-score and thus may act as a regulatory motif of protein kinase domains.
