# Supplementary material for: Large-Scale Discovery and Characterization of Protein Regulatory Motifs in Eukaryotes
Source: PubMed Central journal article supplement (PMC3012054; doi:10.1371/journal.pone.0014444), 2010-12-29
Supplement: pone.0014444.s009.pdf [file pone.0014444.s009.pdf]

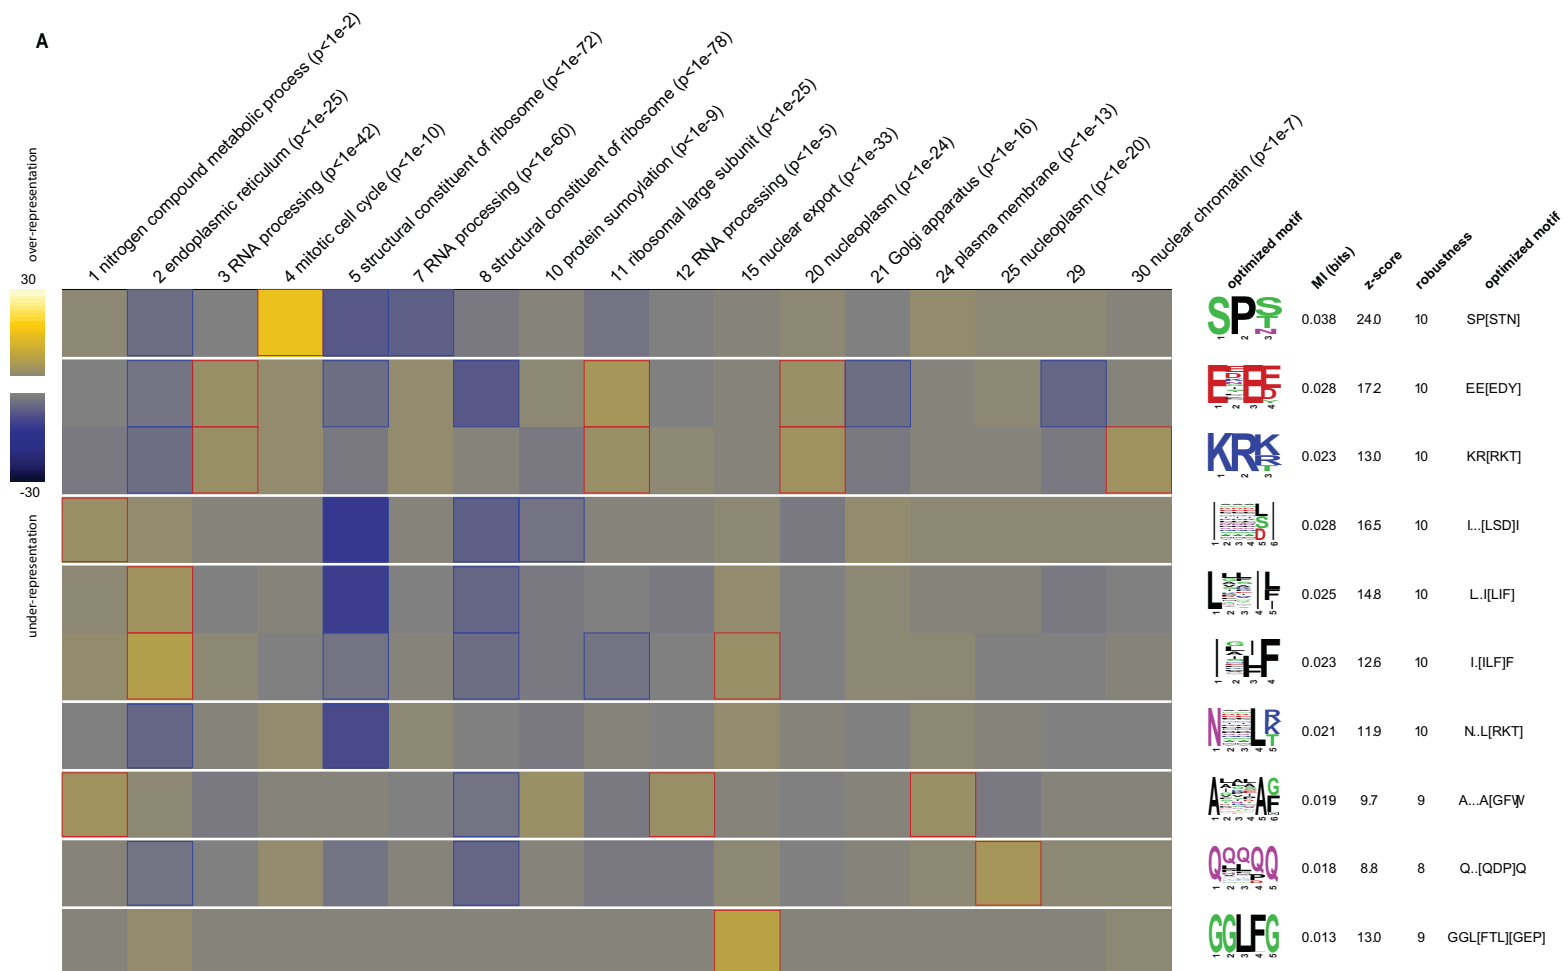

**B**

Note: GO and domain enrichment are for all proteins with a motif.

| Motif         | GO term (p)                                       | Domain enrichment          | Overlap Z-score |
|---------------|---------------------------------------------------|----------------------------|-----------------|
| SP[STN]       | site of polarized growth ( $p < 1e-11$ )          | Zn_clus ( $p < 1e-07$ )    | -1.71           |
| EE[EEDY]      | nuclear lumen ( $p < 1e-13$ )                     | Helicase_C ( $p < 1e-04$ ) | -2.63           |
| L...[LSD]I    |                                                   | HEAT ( $p < 0.001$ )       | 0.54            |
| L...[LIF]     | transporter activity ( $p < 1e-05$ )              | HEAT ( $p < 1e-05$ )       | 1.44            |
| KR[RKT]       | DNA metabolism ( $p < 1e-12$ )                    | Zn_clus ( $p < 1e-05$ )    | 9.1             |
| I...[LIF]F    | transporter activity ( $p < 1e-07$ )              | MFS_1 ( $p < 1e-05$ )      | 1.61            |
| N...L[RKT]    | phosphotransferase activity ( $p < 0.001$ )       | HEAT ( $p < 0.001$ )       | -0.3            |
| A...A[GFW]    | transporter activity ( $p < 1e-06$ )              |                            |                 |
| Q...[QDP]Q    | transcription regulator activity ( $p < 1e-09$ )  |                            |                 |
| GGL[FTL][GEP] | snRNP protein import into nucleus ( $p < 1e-04$ ) |                            |                 |

**Figure S8: Multiclass analysis of clustered protein interaction network**

(A) Protein-protein interaction data from BioGRID was clustered using the MCL graph-clustering algorithm and cluster indices were used as input to FIRE-pro. Ten motifs are found in the protein interaction clusters compared to zero motifs found in a control analysis of genetic-interaction cluster data. A log p-value matrix shows a number of known and unknown motifs involved in various modules of the network. (B) Enrichment analysis of all proteins containing each motif.
