# Supplementary material for: Large-Scale Discovery and Characterization of Protein Regulatory Motifs in Eukaryotes
Source: PubMed Central journal article supplement (PMC3012054; doi:10.1371/journal.pone.0014444), 2010-12-29
Supplement: pone.0014444.s011.pdf [file pone.0014444.s011.pdf]

**Table S1. Phosphorylation motifs found amongst kinase and phosphatase interactors****A. Kinases**

| Symbol  | Gene  | Motif           | Z-score | Best Match (** = known)                     |
|---------|-------|-----------------|---------|---------------------------------------------|
| YBR160W | Cdc28 | SP.[RK]         | 295     | ***CDK substrate motif ([ST]P.[RK])         |
| YJR059W | Ptk2  | RR.[SHP]        | 122     | ***PKA substrate motif (R[RK].S)            |
| YJL164C | Tpk1  | R[RK].S         | 96      | ***PKA substrate motif (R[RK].S)            |
| YBR160W | Cdc28 | V..[TSP]P       | 79      | CDK substrate motif (SP)                    |
| YMR139W | Rim11 | [GSQ]S..[ANV]SP | 72      | ***GSK3 substrate motif (S...S)             |
| YGL180W | Atg1  | [SNG]D..S       | 67      | Casein kinase I motif ([STDE]..S)           |
| YHR135C | Yck1  | [SEN]D.D[SDE]   | 67      | ***Casein kinase II motif ([ST]..[DE])      |
| YHR135C | Yck1  | S.[SEV]D        | 65      | ***Casein kinase II motif ([ST]..[DE])      |
| YGL059W | Pkp2  | R[RQK][ARK]S    | 62      | PKA substrate motif (R[RK].S)               |
| YPL153C | Rad53 | [NIT]SN[NRA]    | 61      |                                             |
| YJL187C | Swe1  | SD.[SDW][DSR]   | 59      | Casein kinase II motif ([ST]..[DE])         |
| YDR477W | Snf1  | [SLV]S[SND]S    | 57      |                                             |
| YBR059C | Akl1  | [SVI]S.DE[SWH]  | 55      | Casein kinase II motif ([ST]..[DE])         |
| YER118C | Sho1  | S[SFV]AS[RTG]   | 55      |                                             |
| YPL153C | Rad53 | [ATR]S...D      | 53      |                                             |
| YPL153C | Rad53 | [DES]E[DEK]E    | 53      | Casein kinase II motif ([ST]..[DE])         |
| YLR423C | Atg17 | [RQY]RLS[ILW]   | 50      | PKA substrate motif (R[RK].S)               |
| YNL298W | Cla4  | SS..[KSQ][SRT]D | 50      |                                             |
| YPL153C | Rad53 | TN[VMT]         | 50      |                                             |
| YPL153C | Rad53 | [QKP]R..S       | 49      | CaM kinase or PKA substrate motif (R..[ST]) |
| YPL153C | Rad53 | [SPA]S.E        | 45      |                                             |
| YJL164C | Tpk1  | T.T[TKN]        | 45      |                                             |
| YAR019C | Cdc15 | H[KHT]..S[SHN]  | 44      |                                             |
| YGL019W | Ckb1  | [SDY]D[SEM]D    | 44      | ***Casein kinase II motif ([ST]..[DE])      |
| YNL307C | Mck1  | R..S[VIN]       | 44      | CaM kinase or PKA substrate motif (R..[ST]) |
| YIL095W | Prk1  | S[PD]SR[SG]     | 44      |                                             |
| YPL203W | Tpk2  | [RHG]R.S[VFS]   | 44      |                                             |
| YJR066W | Tor1  | AS..[SEG]       | 43      |                                             |
| YHR135C | Yck1  | PT              | 42      |                                             |
| YBL016W | Fus3  | K..S[RPA]       | 41      |                                             |
| YMR139W | Rim11 | [TAI]NT[SNV]    | 38      |                                             |
| YJR059W | Ptk2  | ST[SAP]         | 37      |                                             |
| YHL007C | Ste20 | N.S[SVY]        | 37      |                                             |
| YHR135C | Yck1  | A.[TSD]G        | 37      |                                             |
| YPL031C | Pho85 | SS[PTG]         | 36      |                                             |
| YJL164C | Tpk1  | T.[SEQ]P        | 36      |                                             |
| YNL154C | Yck2  | N[NDF]S         | 36      |                                             |
| YHR082C | Ksp1  | [IRT]G.S        | 34      |                                             |
| YGL180W | Atg1  | T..K            | 33      |                                             |
| YHR082C | Ksp1  | S.[ADY]D        | 32      | Casein kinase II motif ([ST]..[DE])         |
| YNL307C | Mck1  | [STF]P..[SAQ]P  | 32      | ***GSK3 substrate motif (S...S)             |
| YJR059W | Ptk2  | S..P[TSK]       | 32      | GSK3 substrate motif (S...S)                |
| YHL007C | Ste20 | S..[TND]N       | 32      | Casein kinase II motif ([ST]..[DE])         |
| YHL007C | Ste20 | S.[PLD]K        | 32      |                                             |
| YJL095W | Bck1  | P[VPI]..S[QSK]  | 31      |                                             |
| YPL031C | Pho85 | TP[PMA]         | 31      |                                             |
| YJL164C | Tpk1  | S..[PRV]K       | 31      |                                             |
| YAR019C | Cdc15 | S..[PWH]S       | 30      | GSK3 substrate motif (S...S)                |
| YJL164C | Tpk1  | S[DKS]Q         | 30      |                                             |
| YNL307C | Mck1  | S.E[ESY]        | 29      |                                             |
| YPL031C | Pho85 | D.D[TIY]        | 27      |                                             |
| YPL203W | Tpk2  | NT[SQF][SRQ]    | 25      |                                             |
| YER118C | Sho1  | R..[SHY]L       | 23      | CaM kinase or PKA substrate motif (R..[ST]) |
| YNL307C | Mck1  | T..T            | 22      |                                             |
| YNL298W | Cla4  | S.K[EWA]        | 17      |                                             |

**B. Phosphatases**

| Symbol  | Gene  | Motif          | Z-score | Best Match                             |
|---------|-------|----------------|---------|----------------------------------------|
| YER133W | Glc7  | P[SIM]..RS[RK] | 57      | GSK3 substrate motif (S...S)           |
| YDL188C | Pph22 | SP.[GD]R[LYN]  | 52      | CDK substrate motif ([ST]P)            |
| YFR028C | Cdc14 | RK.S[LK][EPR]  | 48      | PKA substrate motif (R[RK].S)          |
| YER133W | Glc7  | [KSQ]K[SKE]K   | 44      | TGFBR kinase substrate motif (KKK[ST]) |
| YDL188C | Pph22 | [TIV][FH]SP    | 36      | CDK substrate motif ([ST]P)            |
| YER133W | Glc7  | [DET]D..[SKP]S | 36      | Casein kinase I motif ([STDE]..S)      |
| YDL047W | Sit4  | A[SHY].[SCW]N  | 31      |                                        |
| YER133W | Glc7  | [STV]Y.[NRQ]S  | 28      | SH2_GRB2 (Y.N)                         |

Select serine- and threonine-containing motifs found by FIRE-pro to be enriched among proteins that interact with a particular kinase or phosphatase. Known motifs, i.e. those that match known motifs in both sequence and biological context, are denoted by asterisks.
