# Supplementary material for: Large-Scale Discovery and Characterization of Protein Regulatory Motifs in Eukaryotes
Source: PubMed Central journal article supplement (PMC3012054; doi:10.1371/journal.pone.0014444), 2010-12-29
Supplement: pone.0014444.s012.pdf [file pone.0014444.s012.pdf]

**Table S2. Domain signature motifs**

| <i>Motif</i>     | <i>Z-score</i> | <i>Domain enrichment</i> | <i>Pfam ID</i> | <i>Overlap Z-score</i> | <i>Literature</i> | <i>Run</i>                           |
|------------------|----------------|--------------------------|----------------|------------------------|-------------------|--------------------------------------|
| G.GK[TS]         | 227            | ABC_tran (1e-19)         | PF00005        | 4.5                    | G..G.GK[ST]       | GO: pyrophosphatase activity         |
| [KVY][LIY].DFG   | 205            | Pkinase (1e-85)          | PF00069        | 8.1                    | DFG               | GO: transferase activity             |
| H.D[LIC]K        | 197            | Pkinase (1e-09)          | PF00069        | 8.5                    | HRDLK             | GO: transferase activity             |
| [WFL]D..GQ[EDP]  | 136            | Ras (1e-37)              | PF00071        | 2.7                    | WDTAG             | GO: NTPase activity                  |
| Y.[ASG]PE        | 132            | Pkinase (1e-89)          | PF00069        | 7.4                    | APE               | GO: transferase activity             |
| D[ILMV]W[SAQ]    | 132            | Pkinase (1e-85)          | PF00069        | 8                      | D.WS              | GO: transferase activity             |
| [ILMV]K..N[ILV]L | 129            | Pkinase (1e-83)          | PF00069        | 7.9                    | KP.NLL            | GO: transferase activity             |
| [LFI][YHD].PPG   | 74             | AAA (1e-18)              | PF00004        | 4.4                    | GPPG              | GO: NTP-ase activity                 |
| DE[ADE][DSE]     | 73             | DEAD (1e-08)             | PF00270        | 2.5                    | DEAD              | GO: nucleolus                        |
| [PET][TSE]REL    | 73             | DEAD (1e-10)             | PF00270        | 4.5                    | PTREL             | NOG1: Putative GTPase                |
| [HFG]R.GR[TRS]   | 71             | Helicase_C (1e-19)       | PF00271        | 9.1                    | HR.GR             | GO: rRNA metabolism                  |
| R.[RPK]K         | 69             | Zn_clus (1e-16)          | PF00172        | 13.5                   | R.RK              | GO: transcription regulator activity |
| T[GHW]..[KGH]TL  | 68             | DEAD (1e-10)             | PF00270        | 2.9                    | TGSGKT            | URB1: Nucleolar protein              |
| [ILH]G.G         | 67             | Pkinase (1e-48)          | PF00069        | 6.8                    | G.G               | GO: transferase activity             |
| DL.[GSF]S[EPQ]   | 65             | Kinesin (1e-07)          | PF00225        | 2.2                    | DLAGSE            | Localization: Microtubule            |
| [IMP]K.W[DNP]    | 61             | WD40 (1e-07)             | PF00400        | 3.1                    | WD                | UTP8: Nucleolar protein              |
| C[NDA].C[GRQ]L   | 60             | GATA (1e-16)             | PF00320        | 7.8                    | C..C              | GO: transcription regulator activity |
| DG[TKR][VKI]R    | 57             | WD40 (0.01)              | PF00400        | 2.4                    |                   | NOP6: Putative RNA-binding protein   |
| R[GLT].DI[PN]    | 57             | Helicase_C (1e-09)       | PF00271        | 5.9                    | RGLD              | GO: pyrophosphatase activity         |
| LF.[KHF][LM]H    | 55             | GATA (1e-06)             | PF00320        | 7                      |                   | TOR1: PIK-related protein kinase     |

Select domain signatures, i.e., motifs with high overlap scores. Literature column refers to the name or consensus sequence mentioned in the literature, found by PubMed or Google search of the motif. Run names abbreviated as follows, *GO: category* = binary profile of proteins annotated to a GO category; *Protein: description* = binary profile of proteins interacting with the protein; *Localization: compartment* = binary profile of proteins localized to a compartment.
