# Supplementary material for: Large-Scale Discovery and Characterization of Protein Regulatory Motifs in Eukaryotes
Source: PubMed Central journal article supplement (PMC3012054; doi:10.1371/journal.pone.0014444), 2010-12-29
Supplement: pone.0014444.s013.pdf [file pone.0014444.s013.pdf]

**Table S3. Categorization into known, semi-novel, and novel motifs****A. Categorizing 100 randomly chosen motifs (%)**

| <b>100<br/>Random<br/>Motifs</b> | <b>Non-<br/>Domain<br/>Signatures</b> | <b>Domain<br/>Signature</b> | <b>Totals</b> |
|----------------------------------|---------------------------------------|-----------------------------|---------------|
| Known                            | 15                                    | 3                           | 18            |
| Semi-novel                       | 39                                    | 8                           | 47            |
| Novel                            | 26                                    | 9                           | 35            |
| <i>Totals</i>                    | 80                                    | 20                          | 100           |

**B. Categorizing all ~6900 motifs (%)**

| <b>All motifs</b>       | <b>Non<br/>Domain<br/>Signatures</b> | <b>Domain<br/>Signature</b> | <b>Totals</b> |
|-------------------------|--------------------------------------|-----------------------------|---------------|
| Known }<br>Semi-novel } | 42                                   | 12                          | 55            |
| Novel                   | 36                                   | 10                          | 45            |
| <i>Totals</i>           | 78                                   | 22                          | 22            |

(A) 100 randomly chosen motifs were analyzed by hand and categorized into one of three classifications: known, semi-novel, and novel. Known motifs are those that match previously identified motifs in the literature in both sequence and biological context; semi-novel motifs are those that match a previously identified motif in sequence but not in biological context; novel motifs are those that do not match any previously identified motif. Motifs with a positive overlap Z-score were considered to be domain signatures. (B) All ~6,900 motifs found in this study were automatically classified into one of two categories: known/semi-novel if they matched a previously identified motif, and novel otherwise. Motifs with a positive overlap Z-score were considered to be domain signatures.
