# Supplementary material for: Large-Scale Discovery and Characterization of Protein Regulatory Motifs in Eukaryotes
Source: PubMed Central journal article supplement (PMC3012054; doi:10.1371/journal.pone.0014444), 2010-12-29
Supplement: pone.0014444.s014.pdf [file pone.0014444.s014.pdf]

**Table S4. Motif-discovery algorithms used in comparison**

| Algorithm      | Website (http://)                  | Parameters                                           | Ref.                         |
|----------------|------------------------------------|------------------------------------------------------|------------------------------|
| FIRE-pro       | tavazoielab.princeton.edu/FIRE-pro | k=2-5, g=0-2, N=50000                                | This paper                   |
| Motif-X        | motif-x.med.harvard.edu            | SGD yeast proteome                                   | (Schwartz & Gygi, 2005)      |
| TEIRESIAS      | cbcsrv.watson.ibm.com/Tspd.html    | Exact discovery                                      | (Rigoutsos & Floratos, 1998) |
| DiLiMot        | dilimot.embl.de                    | Removed: Smart, Pfam, Homology; <i>S. cerevisiae</i> | (Neduva et al., 2005)        |
| SLiMFinder 4.1 | bioware.ucd.ie/slimfinder.html     | Upload sequence                                      | (Edwards et al., 2006)       |

Note: Default parameters used unless otherwise noted.
