# Supplementary material for: Large-Scale Discovery and Characterization of Protein Regulatory Motifs in Eukaryotes
Source: PubMed Central journal article supplement (PMC3012054; doi:10.1371/journal.pone.0014444), 2010-12-29
Supplement: pone.0014444.s016.pdf [file pone.0014444.s016.pdf]

**Table S6. Results of algorithm comparison**

| Algorithm & Dataset        | Proteins in input set | No. real motifs (Top Score) | No. profile-shuffled motifs (Top Score) | No. of sequence-shuffled motifs (Top Score) | Top known motif (Rank) | No. real motifs above top profile-   sequence-shuffled score |
|----------------------------|-----------------------|-----------------------------|-----------------------------------------|---------------------------------------------|------------------------|--------------------------------------------------------------|
| <b><i>FIRE-pro</i></b>     |                       |                             |                                         |                                             |                        |                                                              |
| Ymr139w (Rim11)            | 41                    | 8 (72)                      | 2 (39)                                  | 22 (51)                                     | SxxxSP (1)             | 2 1                                                          |
| Ygl059w (Pkp2)             | 92                    | 3 (62)                      | 3 (37)                                  | 10(50)                                      | R[RK][KR]S (1)         | 1 1                                                          |
| Ybr160w (Cdc28)            | 241                   | 17 (295)                    | 1 (21)                                  | 8 (56)                                      | SPx[RK] (1)            | 17 4                                                         |
| Mitochondria               | 526                   | 11 (61)                     | 0(-)                                    | 3 (38)                                      | RFxS (1)               | 11 4                                                         |
| Nucleus                    | 991                   | 6 (131)                     | 0 (-)                                   | 10 (48)                                     | [KR]KR[KR] (2)         | 6 2                                                          |
| <b><i>Motif-X</i></b>      |                       |                             |                                         |                                             |                        |                                                              |
| Ymr139w (Rim11)            | 41                    | 8 (14)                      | 0 (-)                                   | 15 (11)                                     | SxxxS (1)              | 8 1                                                          |
| Ygl059w (Pkp2)             | 92                    | 13 (49)                     | 0 (-)                                   | 11 (10)                                     | RRxS (3)               | 13 9                                                         |
| Ybr160w (Cdc28)            | 241                   | 97 (42)                     | 0 (-)                                   | 191 (16)                                    | SPxK (2)               | 97 32                                                        |
| Mitochondria               | 526                   | 72 (13)                     | 0 (-)                                   | 124 (16)                                    | RxF (4)                | 72 0                                                         |
| Nucleus                    | 991                   | 273 (29)                    | 0 (-)                                   | 557 (30)                                    | KKxK (2)               | 273 0                                                        |
| <b><i>TEIRESIAS *</i></b>  |                       |                             |                                         |                                             |                        |                                                              |
| Ymr139w (Rim11)            | 41                    | (31)                        | (18)                                    | (28)                                        | SxSxS (2)              | 161 2                                                        |
| Ygl059w (Pkp2)             | 92                    | (47)                        | (75)                                    | (39)                                        | RRxS (5)               | 0 12                                                         |
| Ybr160w (Cdc28)            | 241                   | (155)                       | (86)                                    | (130)                                       | SPxK (7)               | 260 7                                                        |
| Mitochondria               | 526                   | (182)                       | (187)                                   | (163)                                       | RxxST (404)            | 0 3                                                          |
| Nucleus                    | 991                   | -                           | -                                       | -                                           | -                      | - -                                                          |
| <b><i>DiLiMOT †</i></b>    |                       |                             |                                         |                                             |                        |                                                              |
| Ymr139w (Rim11)            | 41                    | (24)                        | (12)                                    | (>28)                                       | SRxxS (1)              | >70 0                                                        |
| Ygl059w (Pkp2)             | 92                    | (>28)                       | (17)                                    | (>28)                                       | RRxS (1)               | 45 1                                                         |
| Ybr160w (Cdc28)            | 241                   | -                           | -                                       | -                                           | -                      | - -                                                          |
| Mitochondria               | 526                   | -                           | -                                       | -                                           | -                      | - -                                                          |
| Nucleus                    | 991                   | -                           | -                                       | -                                           | -                      | - -                                                          |
| <b><i>SLiMFinder ‡</i></b> |                       |                             |                                         |                                             |                        |                                                              |
| Ymr139w (Rim11)            | 41                    | 11 (.09)                    | 8 (.59)                                 | 5 (.93)                                     | SR..S (11)             | 4 7                                                          |
| Ygl059w (Pkp2)             | 92                    | 35 (1e-9)                   | 3 (.05)                                 | 3 (.71)                                     | RRxS (1)               | 5 16                                                         |
| Ybr160w (Cdc28)            | 241                   | -                           | -                                       | -                                           | -                      | - -                                                          |
| Mitochondria               | 526                   | -                           | -                                       | -                                           | -                      | - -                                                          |
| Nucleus                    | 991                   | -                           | -                                       | -                                           | -                      | - -                                                          |

† DiLiMot presents up to 70 ranked motifs, but returned 0 motifs for the largest three datasets.

‡ SLiMFinder score is significance. Three largest data sets exceeded 1 hour wall time of online interface.

\* TEIRESIAS score = No. proteins containing the motif; Online interface crashes for largest data set

Note: DiLiMot and TEIRESIAS do not use thresholds but rather present all candidate motifs as a ranked list with associated scores. Therefore the number of motifs is left blank for these algorithms.
